# Supplementary material
Source: PubMed Central journal article supplement (PMC2268790)

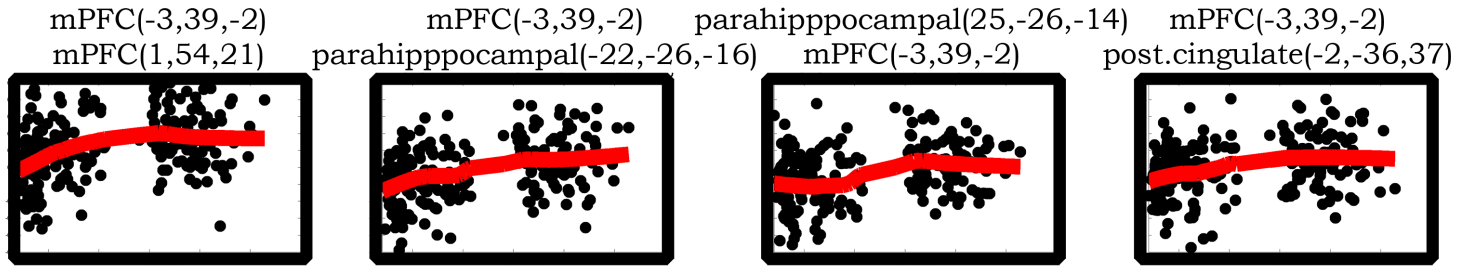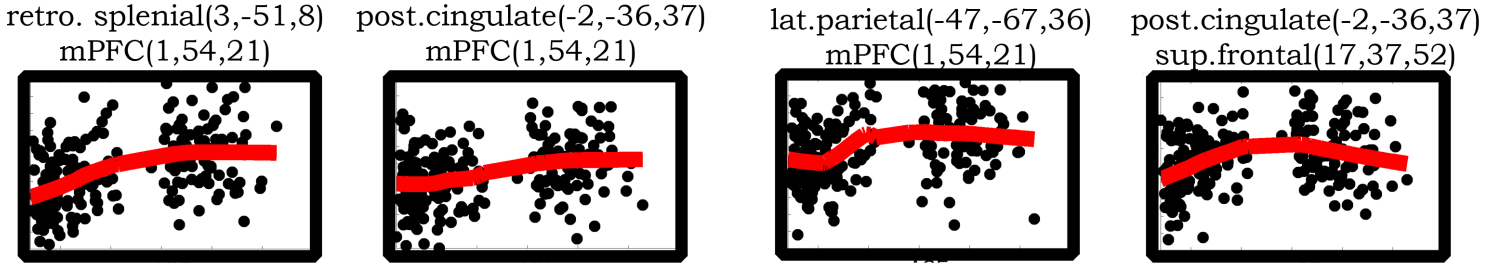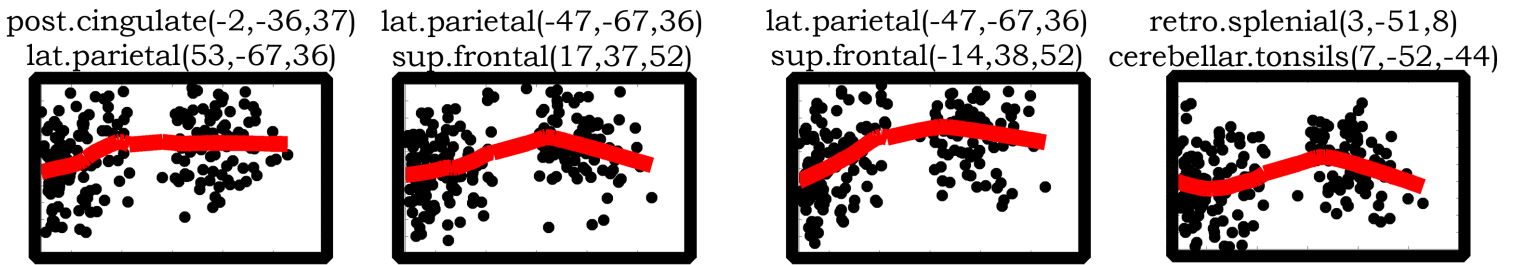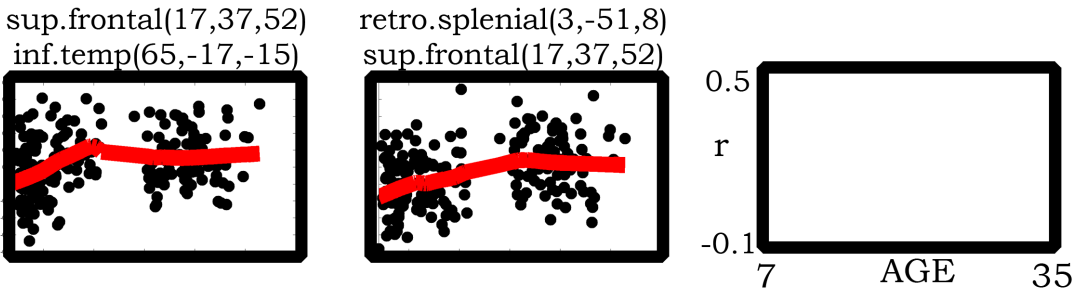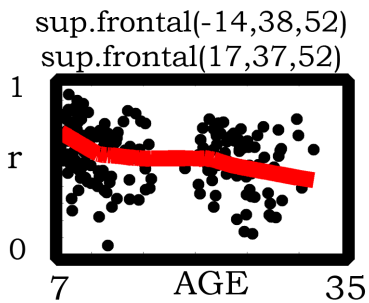

Supplement: pnas_0800376105_1.pdf [file pnas_0800376105_1.pdf]
